**TITLE:** VECURONIUM INFUSION VS. MEPERIDINE IN THE TREATMENT OF SHIVERING FOLLOWING CARDIOPULMONARY BYPASS

**AUTHORS:** J.J. Fassero, M.D., J.Z. Berend, B.S., R.N. Sladen, M.B.ChB.

**AFFILIATION:** Anesth. Service, VA Med. Ctr., Dept. Anesthesiology, Duke Univ. Med. Ctr., Durham, North Carolina 27710

**Introduction:** Adverse effects of shivering following hypothermic cardiopulmonary bypass (CPB) include increased  $O_2$  consumption ( $VO_2$ ), hypercarbia, acidosis and hemodynamic instability.<sup>1</sup> We hypothesized that vecuronium (VEC) abolishes shivering and its adverse effects more reliably and effectively than meperidine (MEP).

**Methods:** After institutional approval and consent, 20 male patients (age  $59 \pm 9$  yrs), undergoing hypothermic CPB, (CABG, n=18; AVR, n=2), were randomized and prospectively studied. Patients undergoing reoperation, with CHF or COPD, hemodynamic instability, or those who did not shiver, were excluded. Patients were anesthetized with a standard fentanyl-relaxant-benzodiazepine technique. Postop sedation was assured by a continuous infusion of fentanyl in the intensive care unit (ICU) for the study duration. Standard monitoring was used, plus an Oximetrix® pulmonary artery catheter (Abbott Inc), neuromuscular blockade monitor, and capnograph.

After stabilization in the ICU, baseline data were obtained: heart rate (HR), systolic blood pressure (SBP), pulmonary artery wedge (PAW), cardiac output (CO), continuous mixed venous oxygen saturation ( $SvO_2$ ), core temp, end-tidal  $CO_2$  ( $EtCO_2$ ), arterial and mixed venous gases,  $FI_{O_2}$  and hemoglobin. Patients who shivered within 6 hours of ICU admission were randomized to receive MEP (Group I, n=10), or VEC (Group II, n=10). Shivering was scored: 0=none, 1=masseter spasm, 2=localized, 3=generalized, and 4=violent. MEP was given as 25 mg IV q15 min until shivering score = 0 or 75 mg was given. If shivering persisted, patients received VEC. Group II patients received VEC 0.1 mg/kg IV followed by 1.0  $\mu$ g/kg/min continuous infusion, adjusted q15 min to maintain 1 twitch on the train-of-4 blockade monitor. Data were repeated 15 min after each intervention and at 1, 2 and 4 hrs post treatment.  $VO_2$  was derived by Fick

equation. Data were analyzed by ANOVA and Fisher's LSD.

**Results:** In 50% of Group I patients (5/10) MEP successfully abolished shivering (MEP-S), but in 50%, (5/10) MEP failed (MEP-F). In 100% of Group II patients (10/10) shivering ceased, and remained absent during VEC infusion. In 5/5 MEP-F patients who subsequently received VEC, shivering resolved. There was no significant difference in mean  $VO_2$ ,  $SvO_2$  and  $EtCO_2$  between Groups I and II at baseline and at shivering. However, with treatment VEC induced a significantly greater increase in  $SvO_2$  and decrease in  $VO_2$  and  $EtCO_2$  than MEP ( $p < 0.05$ , Single factor ANOVA). The % decrease in  $VO_2$  (Fig 1) and  $EtCO_2$  after treatment was significantly greater with VEC than in both MEP-S and MEP-F patients, but the % increase in  $SvO_2$  with VEC was greater than that in MEP-F patients only. There were no significant differences in HR, SBP or CO; however, MEP patients frequently required reduction of vasodilator or sedative infusions to maintain stability. There was no difference in time to postoperative awakening or extubation.

**Discussion:** VEC following CPB provides assurance of abolishing shivering with marked improvement in  $VO_2$  and  $EtCO_2$ . Control may be maintained by continuous VEC infusion up to 4 hrs without delaying extubation. Cessation of shivering with MEP is unpredictable, occurs in only 50% of cases, and its benefit in reducing  $VO_2$  and  $EtCO_2$  is significantly less than VEC.

**Reference:** 1. Journal of Cardiothoracic Anesthesia: 1:24-28, 1987

**Fig.1.** Percent change in  $VO_2$  from baseline to shivering, and from shivering to response. Means  $\pm$  SD; Single factor ANOVA.

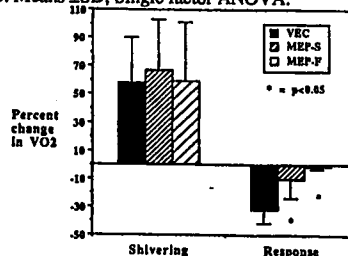

## A1230

**TITLE:** AMRINONE INCREASES VENOUS ADMIXTURE AND DECREASES ARTERIAL OXYGENATION ( $PaO_2$ ) AFTER CORONARY ARTERY BYPASS GRAFT (CABG) SURGERY

**AUTHORS:** RC Prielipp, MD, JF Butterworth, IV, MD, GP Zaloga, MD, PG Robertie, MD, RL Royster, MD

**AFFILIATION:** Department of Anesthesia, Wake Forest University Medical Center, Winston-Salem, NC 27103

**INTRODUCTION:** Amrinone (AMR) is a bipyridine used to support the circulation after CABG surgery. As a vasodilating inotrope, AMR may impair hypoxic pulmonary vasoconstriction (HPV), decreasing  $PaO_2$  and increasing venous admixture ( $Q_s/Q_t$ ).

**METHODS:** After IRB approval, 24 consenting patients with good left ventricular function were studied 24 hrs after CABG surgery. All patients were extubated, received supplemental  $O_2$ , and did not require vaso-active drugs. Standard hemodynamic measurements were performed; cardiac output (CO) was determined by thermodilution. Arterial and mixed venous oxygen tensions ( $PaO_2$  and  $PvO_2$ ) and saturations ( $SA_{O_2}$  and  $SvO_2$ ) were measured.

After baseline hemodynamic measurements, AMR was administered at one of two doses: 0.75 mg/kg bolus (B) + an infusion (I) of 10  $\mu$ g/kg/min (LOW), or 2.25 mg/kg B + 20  $\mu$ g/kg/min I (HIGH). Measurements were repeated after B, and after 10 min of I. Cardiac index (CI) and shunt ( $Q_s/Q_t$ ) were calculated. Data are reported as means  $\pm$  SEM. Data were analyzed by ANOVA for significant differences ( $P < 0.05$ ).

**RESULTS:** Low- and high-dose AMR increased CI by 10.5% and 22.6%, respectively. AMR at both doses

decreased arterial and pulmonary pressures and  $SA_{O_2}$ .  $PaO_2$  decreased following AMR (Fig 1).  $Q_s/Q_t$  significantly increased at both doses of AMR. Surprisingly,  $SvO_2$  was unchanged at both AMR doses despite the significant increase in CI.

**DISCUSSION:** AMR increased CI and decreased systemic vascular resistance consistent with its inotropic and vasodilatory effects. Despite the increases in CI,  $SvO_2$  remained unchanged. Thus,  $SvO_2$  may be a poor guide for inotropic titration of AMR (1). AMR also significantly decreased  $PaO_2$  and increased  $Q_s/Q_t$ , due, we believe, to inhibition of hypoxic pulmonary vasoconstriction (HPV). Inhibition of HPV by AMR has previously been reported in rats (2). Thus, careful  $PaO_2$  monitoring during AMR therapy appears indicated.

**REFERENCES:** (1) Chest 95:1289-1294, 1989.

(2) Proc Soc Exp Biol Med. 173:205-212, 1983.

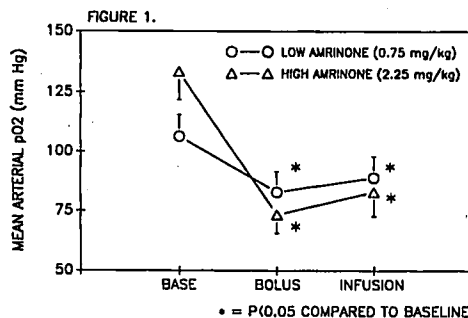

Source: https://asa2.silverchair.com/anesthesiology/article-pdf/73/3A/NA/666583/0000542-199009001-01229.pdf
